# Supplementary material for: Synapsin condensation is governed by sequence-encoded molecular grammars
Source: PubMed Central journal article supplement — bioRxiv. 2024 Oct 20:2024.08.03.606464. Originally published 2024 Aug 4. Preprint. [Version 2] doi: 10.1101/2024.08.03.606464 (PMC11312526; doi:10.1101/2024.08.03.606464), 2024-10-20
Supplement: NIHPP2024.08.03.606464v1-supplement-1.pdf [file NIHPP2024.08.03.606464v1-supplement-1.pdf]

## Supporting Information for

# Driving forces for condensation of synapsin are governed by sequence-encoded molecular grammars

Christian Hoffmann <sup>a,1</sup>, Kiersten M. Ruff <sup>b,1</sup>, Irina Edu <sup>c</sup>, Min Kyung Shinn <sup>b</sup>, Johannes V. Tromm <sup>a</sup>, Matthew R. King <sup>b</sup>, Avnika Pant <sup>b</sup>, Hannes Ausserwöger <sup>c</sup>, Jennifer R. Morgan <sup>d</sup>, Tuomas P. J. Knowles <sup>c,e</sup>, Rohit V. Pappu <sup>b,2</sup>, Dragomir Milovanovic <sup>a, f, g, h, 2</sup>

### This PDF file includes:

Extended Methods  
SI References

## Supporting Information Text

### Analysis of IDRs using NARDINI+

Sequence grammar analysis was performed using NARDINI+ as described in (1). Briefly, NARDINI+ calculates z-scores of compositional and patterning grammar features previously shown to be important for IDR conformation, interactions, and function (2). Five additional compositional grammar features were examined that were not described in King et al. These include the number of positive, negative, polar, aliphatic, and aromatic residues, giving a readout on valence compared to the full IDRome. For a given IDR, compositional z-scores are calculated by extracting the compositional feature of the given IDR and using the mean and standard deviations from the full human IDRome (24508 IDRs). The human IDRome contains all IDRs of length  $\geq 30$ , extracted from the UniProt human proteome (UP000005640) and MobiDB predictions (3) To calculate the patterning z-scores for a given IDR, NARDINI is performed (4). Here, the asymmetry of patterning of two residue types in a given IDR sequence is compared to the mean and standard deviations of  $10^5$  random sequences of the same composition.

### Extraction of condensate-specific enriched grammar features

Condensate specific protein lists were extracted from various sources and cross-referenced with the human IDRome to extract condensate specific IDRs. As described in (1), proteins localized to nucleoli and nuclear speckles were extracted from the Human Protein Atlas (HPA). Proteins localized to P-bodies and stress granules were extracted from (5) and (6), respectively. Synaptic vesicle proteins were extracted from (7) using the list of “SV-resident” proteins leading to 125 IDR sequences. Buffered by SV proteins were extracted from (8) (here paralogs were included) to yield 47 IDRs. To determine which grammar features were enriched in specific condensates, the human IDRome was split into two sets: (1) the current condensate-specific IDR set and (2) the remaining human IDRome. Then, the distributions for each of the 90 different z-scores were compared using the two-sample Kolmogorov-Smirnov test and a p-value was calculated. The signed

$\log_{10}(\text{p-value})$  was calculated for p-values  $< 0.05$ . Specifically,  $-\log_{10}(\text{p-value})$  was calculated if the condensate-specific mean z-score value was greater than the rest of the IDRome mean z-score value and  $\log_{10}(\text{p-value})$  was calculated if the condensate-specific mean z-score was smaller. Thus, positive values imply the given feature is enriched or blockier in the condensate-specific IDR set.

### **Extraction of IDR grammar clusters within SV proteins**

Grammar feature z-scores were calculated using NARDINI+ as described above for IDRs of SV proteins: SNCA, SNCB, SNCG, SYN1, SYN2, SYN3, SYP, SYNPR, SYNGR1, SV2A, SV2B, SV2C, STX7, VAMP1, VAMP2, VGLUT1, VGLUT2, and VGLUT3. Figure 1B shows a filtered set of enriched features for the four clusters having at least 3 IDRs determined by hierarchical clustering using the Euclidean distance and Ward's linkage method (9).

### **Evolutionary analysis of Synapsin IDRs**

The list of eukaryotic orthologous SYN1 orthologs were extracted from EggNOG (10). The proteomes of 12 additional species were examined for orthologs if not included in the original EggNOG list. These include *Aptenodytes forsteri* (taxid: 9233), *Doryteuthis pealeii* (taxid: 1051067), *Lampetra fluviatilis* (taxid: 7748), *Leptonychotes weddellii* (taxid: 9713), *Marmota marmota marmota* (taxid: 9994), *Microcebus murinus* (taxid: 30608), *Octopus vulgaris* (taxid: 6645), *Petromyzon marinus* (taxid: 7757), *Physeter macrocephalus* (taxid: 9755), *Urocitellus parryii* (taxid: 9999), *Ursus americanus* (taxid: 9643), and *Ziphius cavirostris* (taxid: 9760) whose proteomes were extracted from UniProt. BLASTp was used to extract only the most similar ortholog per species as compared to the full SYN1 sequence. Then, MUSCLE sequence alignment was utilized to align orthologous sequences (11). From the alignments, Jalview was used to extract the IDR regions in orthologs corresponding to residues 415-705 of human SYN1 (12). Only orthologous sequences of length  $\geq 15$  and housing no unnatural amino acids were kept. NARDINI+ was then ran on all orthologous sequences where the human IDRome was used as the prior to extract the z-scores of the compositional features. Overall, 152 species were analyzed.

### **Calculation of mean net residue type profiles**

Here, we consider residue types  $\text{pol} \equiv \{C, H, N, Q, S, T\}$  and  $\text{pro} \equiv P$ . For a given sequence, the fraction of pol residues minus the fraction of pro residues is calculated for each sliding window of length five. Then, the values from all sliding windows that contain a given residue are averaged to yield a residue specific mean net residue type value. These values are plotted in Figure 1D.

### **Cloning of Synapsin 1 IDR variants**

Human synapsin-1 coding sequence is based on the NM\_006950.3 NCBI reference Sequence. The complexity of the sequence, such as GC-rich regions, was manually altered to allow efficient gene synthesis while leaving the protein sequence unchanged (NP\_008881.2). An endogenous Sacl restriction site at codons E408-E409 (GAGCTC) was silenced by altering the nucleotide sequence to GAGCTG. To allow for easy subsequent exchange of the synapsin-1 IDR, a BamHI was added at codons G389-S390 by changing the nucleotide sequence from GGTTCC to GGATCC. The optimized human synapsin-1 codon sequence and the variant IDR sequences (a.a. 389-705) were created by gene synthesis (Eurofins, HIFI DNA assembly). Subsequently, IDR fragments

starting from a.a. 389 were subcloned using the restriction sites BamHI and SacI, yielding sequences of full-length Synapsin 1 containing IDR variants. The resulting full-length synapsin-1 sequences (WT, scrambled IDR, RtoK IDR) were either subcloned into a pCMV expression plasmid as a C-terminal fusion protein to mCherry for microscopy (13) by KpnII and SacI or subcloned into a His14-SUMO\_Eu1-EGFP-MCS plasmid for protein purification by BglII and KpnI (14). All constructs were verified by Sanger sequencing.

### **Cell culture and transfection**

HEK 293T cells were grown in Dulbecco's Modified Eagle's Medium GlutaMAX supplement (10566016, Gibco) supplemented with 10% fetal bovine serum (12106C, Sigma), 1% MEM Non-essential Amino Acid Solution (M7145, Sigma) and 1% penicillin/streptomycin (15140122, Gibco) at 37 °C and 5% CO<sub>2</sub>. For imaging, cells were seeded on 25 mm cover glasses. Cells were transfected with a total of 2 µg of plasmid DNA using Lipofectamine 2000 (11668500, Invitrogen) following the manufacturer's instructions. In brief, the final transfection mixture contained 3 µL of lipofectamine with 2 µg of total plasmid DNA in 200 µL OptiMEM (31985070, Gibco). Transfection mix was incubated for 20 min at room temperature before adding to seeded HEK cells (confluency ~ 60-70%) and incubated overnight at 37 °C and 5% CO<sub>2</sub>. For protein purification experiments, Expi293F™ suspension cultures (A14527, Gibco) were maintained in Expi293™ Expression Medium (A1435102, Gibco) according to the manufacturer's protocol (37 °C, 8% CO<sub>2</sub>, 125 rpm). Transfection of suspension cultures (30 mL) was performed with 30 µg of plasmid DNA following the ExpiFectamine™ 293 Transfection Kit guidelines.

### **Protein expression of Synapsin 1 IDR variants**

EGFP-tagged synapsin-1 IDR variants were expressed in EXP1 cells (HEK derivative) and purified by a two-step purification strategy consisting of NiNTA-affinity and size-exclusion chromatography followed by His-SUMO-tag removal, as described (14) (15). Briefly, His14-SUMO\_Eu1-synapsin-1 IDR variants were expressed in Expi293F™ cells (Thermo Fisher Scientific) for 3 days following enhancement. Cells were lysed by three cycles of freezing and thawing in a buffer that contained 25 mM Tris-HCl (pH 7.4), 300 mM NaCl, 0.5 mM TCEP (buffer A) supplemented with EDTA-free Roche Complete protease inhibitors, 15 mM imidazole, 10 µg/mL DNaseI and 1 mM MgCl<sub>2</sub>. The purification steps were carried out at 4°C. Lysate clearance was done by centrifugation for 40 min at 30,000xg. The soluble supernatant was incubated with complete His-Tag Purification resin (Roche) in a polyprep column (Biorad) on a rotating platform for 1 h. Washing steps were done with buffer A and elution was performed in buffer A with 400 mM imidazole. Fractions were concentrated using a 30 K MWCO protein concentrator (Millipore) and applied to size exclusion chromatography (Superdex™ 200 Increase 10/300, GE Healthcare) in buffer A. Fractions that contained the His14-SUMO\_Eu1-Synapsin 1 IDR variant were combined subjected to tag removal with SENP\_EuB SUMO protease digest overnight (protease:protein ratio of 1:20). The cleaved His-SUMO-tag and His-tagged SENP protease was removed by supplementing the reaction with 15 mM imidazole and passing it 3 times over preequilibrated (buffer A) complete His-Tag Purification resin. Proteins in the flow-through were concentrated with a 30 K MWCO protein concentrator (Millipore) and subjected to dialysis against 25 mM Tris-HCl (pH 7.4), 150 mM NaCl, 0.5 mM TCEP in Thermo Slide-A-Lyzer floating cups (MWCO 10 kDa). Proteins were snap-frozen in liquid nitrogen and stored at -80 °C until use.

## Microscopy and image analysis

For *in vitro* reconstitution of EGFP-Synapsin 1 IDR variants, 8  $\mu\text{M}$  protein was coincubated with polyethylene glycol (PEG 8,000) at a final concentration of 3% in a buffer containing 25 mM Tris-HCl (pH 7.4), 150 mM NaCl and 0.5 mM TCEP. After the addition of PEG, the condensation reaction was transferred to a glass bottom dish (Cellvis D35-20-1.5-N). Imaging was performed on a Nikon spinning disk confocal CSU-X microscope equipped with a Plan Apo  $\lambda$  60x Oil objective and a pco.edge camera. The excitation wavelength was 488 nm for EGFP, and image analysis was performed using ImageJ2 (Version: 2.9.0/1.53t).

For live-cell confocal imaging in HEK cells an Andor DU-888 X-9798 camera and excitation wavelength at 561 nm were used of mCherry-tagged synapsin-1 IDR variants.

## The PhaseScan approach for mapping phase diagrams

The microfluidic devices were fabricated using standard soft-lithography (16) (17). Devices were designed using the AutoCAD (AutoDesk) software and then printed on a photomask (Micro Lithography). To obtain a master with microchannels of approximately 50  $\mu\text{m}$  height, SU-8 3050 (Kayaku Advances Materials) was poured onto a silicon wafer (MicroChem) and spun using a spincoater (Laurell Technologies) for 45 s at 3000 rpm. After soft-baking at 95  $^{\circ}\text{C}$  for 25 min, the wafer with the photomask placed on it was subjected to UV exposure for 60 s. Post-exposure baking at 95  $^{\circ}\text{C}$  for 5 min was then followed by developing with propylene glycol methyl ether acetate (PGMEA, Sigma-Aldrich) and a washing step with isopropanol (IPA, VWR Chemicals). To fabricate the devices, polydimethylsiloxane (PDMS, Sylgard 184) was poured over the master, degassed and then baked at 65  $^{\circ}\text{C}$  for 1.5 h. Subsequently, devices were cut out and corresponding holes for the inlets and outlets were punched. A plasma oven (Diener Electronic) was used to treat the devices and enable bonding them to glass slides. The last step was to apply hydrophobic surface modification to the devices using 2% (v/v) trichloro(1H,1H,2H,2H-perfluorooctyl)silane (Sigma-Aldrich) in hydrofluoroether HFE-7500 (Fluorochem).

The PhaseScan microfluidic platform was used to map high-density phase diagrams (16). The following three aqueous solutions were prepared to be mixed on-chip: 6  $\mu\text{M}$  stock of one of the three EGFP labelled synapsin-1 variants in 25 mM Tris-HCl (pH 7.4), 150 mM NaCl, 0.5 mM TCEP; solution of the corresponding buffer and a solution of polyethylene glycol (PEG 8000) 10% (w/v) in the same buffer, barcoded with 2  $\mu\text{M}$  Alexa Fluor 647 free dye. Additionally, an oil solution of HFE-7500 (Fluorochem) with 4% surfactant (RAN Biotechnologies) was used for water-in-oil droplet encapsulation. The flow rates of the three aqueous solutions were varied automatically using pressure-controlled pumps (LineUp Flow EZ, Fluigent) according to a pre-programmed flow profile such that each microfluidic droplet contained different concentrations of protein and PEG. The total flow rate of the aqueous solutions was kept constant at 60  $\mu\text{L}/\text{h}$ , while the oil flow rate was 150  $\mu\text{L}/\text{h}$ , generating droplets of approximately 70  $\mu\text{m}$  in diameter. Droplets were incubated for 3 minutes before imaging in the same microfluidic chip at two wavelengths (488 nm and 647 nm) at the same time using an epifluorescence microscope (Cairn Research), equipped with a 10x air objective (Nikon CFI Plan Fluor) and a dichroic filter set (Cairn Research). A semi-automated custom-written Python script (Python version 3.9.7) was used to analyse the images, i.e. to detect droplets and classify them as phase separated (1) or mixed (0) by employing a convolution neural network (CNN) (18). To allow calculation of the concentration of the components in each droplet, images of calibration droplets containing only the stock solutions of protein or PEG were recorded. A double-

gaussian fit was applied over the fluorescence intensity histograms of the calibration droplets to correlate the intensities back to the stock concentration (19). Hence, each microfluidic droplet provides information for one data point on the phase diagrams presented as scattered plots. Phase separation probability was further determined for each data point by averaging over its neighboring points within a radius of 5% of the maximum limit of each axis. The boundaries were determined using fitting that is based on support vector machine-based methods.

### **Extracting low concentration arms of phase boundaries**

First, we generate a two-dimensional histogram of all points that have a phase separation probability of at least 0.55. To eliminate outliers, if there exists at least three data points for the scramble or RtoK sequences and five data points for the WT sequence in a given bin, then the x and y positions of that bin are kept. The boundary is then drawn using these x and y positions and calculating the convex hull with rounded corners.

### **Measurements of cluster distribution in the subsaturated solution**

Microfluidic Resistive Pulse Sensing (MRPS) measurements were performed on an nCS1 instrument (Spectradyn LLC, Signal Hill, CA, USA). 8  $\mu$ M of purified synapsin construct was mixed with 3% PEG 8,000 in buffer (25 mM Tris-HCl (pH 7.4), 150 mM NaCl, 0.5 mM TCEP) in an Eppendorf tube to induce phase separation. 5  $\mu$ L of samples were measured using C-2000 cartridges, with a measurement range of 250–2000 nm. At least three acquisitions (triplicates) were collected and combined for analysis, with each acquisition being collected over 10 minutes. Control experiments were performed with 3% PEG 8,000, where no significant abundance of particles was detected. The particle size distributions from the triplicate experiments were averaged and the resulting curve was smoothed using the LOWESS method in Prism 10 (GraphPad, Boston, MA, USA).

### **Analysis of pH in Synapsin 1 condensates**

The ratiometric pH-sensitive dye, 5-(and-6)-Carboxy SNARF™-1 (C1270, Invitrogen), was dissolved to a final concentration of 10 mM in ddH<sub>2</sub>O. For calibration, 25 mM Tris-HCl, 150 mM NaCl, and 0.5 mM TCEP buffer were prepared at different pH values (pH 6.0-9.0, steps: 0.5 pH units). All calibration curves were taken on the same day as the samples with synapsin-1 condensate were analyzed (all in triplicates). In brief, the calibration buffer was mixed with 20  $\mu$ M final SNARF-1 dye (5  $\mu$ L final reaction volume) and placed on a glass bottom dish (Cellvis D35-20-1.5-N). Imaging was performed on a Nikon laser scanning confocal AX NSPARC microscope (Ti2, AX camera, Galvano scanner, 2x line averaging, 1024x1024 px resolution, 1.0  $\mu$ s dwell time) equipped with a Plan Apo  $\lambda$ D 60x oil OFN25 DIC N2 objective. Ratiometric imaging of the SNARF-1 dye was performed by excitation at 561 nm and simultaneous readout of the two GaAsP PTMs with different freely tunable emission bands. The first band was set to 582-586 nm (center wavelength: 584 nm) and the second band was set to 660-664 nm (center wavelength: 662 nm). A total of 20 z-stacks were acquired from the cover glass surface into the buffer solution with a step size of 0.20  $\mu$ m (total measured relative z-height 4.0  $\mu$ m). Over the entire pH range, the calibration curves were acquired for each z-stack at the same distance from the surface of the coverglass and fitted to a one-phase decay function using GraphPad Prism 10.

For the pH analysis of EGFP-synapsin-1 IDR variants, 8  $\mu$ M protein was cocubated with 3% PEG 8,000 and 20  $\mu$ M SNARF-1 dye in a buffer containing 25 mM Tris-HCl (pH 7.5), 150 mM NaCl and 0.5 mM TCEP. Ratiometric z-stacks were recorded

from the cover glass surface with the same step size and ratiometric imaging settings as for the calibration curves. Transmission detection was acquired using the 561-nm laser line. Additionally, imaging of EGFP was performed by excitation at 488 nm and emission at 499-551 nm. Of note, while synapsin-1 WT and scrambled IDR condensates formed readily within minutes, synapsin-1 RtoK IDR variant condensate formation was forced by extending the incubation time on the cover glass to one hour.

For image analysis, each pixel of the 584-nm emission image was divided by the corresponding pixel of the 662-nm emission image for each individual z-stack. The resulting ratio z-stack series was converted to a pH stack by applying the corresponding z-slice calibration curve to each matching ratio z-slice. All measurements were performed in three independent reconstitutions with 10 condensates selected from each single condition. A dense phase ROI was outlined with the segmented line tool in ImageJ, and a corresponding circular dilute phase ROI (diameter: 4.3  $\mu\text{m}$ ) was placed 2  $\mu\text{m}$  away from the dense phase. ROIs were selected on a single z-plane. Mean pH values of both dense and dilute phases were plotted as violin plots. One-Way ANOVA tests (multiple comparisons, Tukey,  $\alpha=0.05$ ) were performed for statistical analysis.

## SI References

1. M. R. King, *et al.*, Macromolecular condensation organizes nucleolar sub-phases to set up a pH gradient. *Cell* **187**, 1889-1906.e24 (2024).
2. T. Zarin, *et al.*, Identifying molecular features that are associated with biological function of intrinsically disordered protein regions. *eLife* **10**, e60220 (2021).
3. D. Piovesan, *et al.*, MobiDB: 10 years of intrinsically disordered proteins. *Nucleic Acids Res* **51**, D438–D444 (2022).
4. M. C. Cohan, M. K. Shinn, J. M. Lalmansingh, R. V. Pappu, Uncovering Non-random Binary Patterns Within Sequences of Intrinsically Disordered Proteins. *J Mol Biol.* **434**, 167373 (2022).
5. A. Hubstenberger, *et al.*, P-Body Purification Reveals the Condensation of Repressed mRNA Regulons. *Mol Cell* **68**, 144-157.e5 (2017).
6. S. Jain, *et al.*, ATPase-Modulated Stress Granules Contain a Diverse Proteome and Substructure. *Cell* **164**, 487–498 (2016).
7. Z. Taoufiq, *et al.*, Hidden proteome of synaptic vesicles in the mammalian brain. *Proc Natl Acad Sci USA* **117**, 33586–33596 (2020).
8. A. Denker, K. Kröhnert, J. Bückers, E. Neher, S. O. Rizzoli, The reserve pool of synaptic vesicles acts as a buffer for proteins involved in synaptic vesicle recycling. *Proc Natl Acad Sci USA* **108**, 17183 17188 (2011).
9. J. H. Ward, Hierarchical Grouping to Optimize an Objective Function. *J Am Stat Assoc* **58**, 236 (1963).

10. J. Huerta-Cepas, *et al.*, eggNOG 5.0: a hierarchical, functionally and phylogenetically annotated orthology resource based on 5090 organisms and 2502 viruses. *Nucleic Acids Res* **47**, D309–D314 (2019).
11. R. C. Edgar, MUSCLE: multiple sequence alignment with high accuracy and high throughput. *Nucleic Acids Res* **32**, 1792–1797 (2004).
12. A. M. Waterhouse, J. B. Procter, D. M. A. Martin, M. Clamp, G. J. Barton, Jalview Version 2—a multiple sequence alignment editor and analysis workbench. *Bioinformatics* **25**, 1189–1191 (2009).
13. C. Hoffmann, *et al.*, Synapsin Condensates Recruit alpha-Synuclein. *J Mol Biol* **433**: 166961 (2021).
14. C. Hoffmann, *et al.*, Synapsin condensation controls synaptic vesicle sequestering and dynamics. *Nat Commun* **14**, 6730 (2023).
15. C. Akshita, *et al.*, Condensates of synaptic vesicles and synapsin are molecular beacons for actin sequestering and polymerization. *bioRxiv* 2024.07.19.604346 (2024). <https://doi.org/10.1101/2024.07.19.604346>.
16. W. E. Arter, *et al.*, Biomolecular condensate phase diagrams with a combinatorial microdroplet platform. *Nat Commun* **13**, 7845 (2022).
17. D. Qin, Y. Xia, G. M. Whitesides, Soft lithography for micro- and nanoscale patterning. *Nat Protoc* **5**, 491–502 (2010).
18. N. A. Erkamp, *et al.*, Spatially non-uniform condensates emerge from dynamically arrested phase separation. *Nat Commun* **14**, 684 (2023).
19. H. Ausserwöger, *et al.*, Biomolecular condensates sustain pH gradients at equilibrium driven by charge neutralisation. *bioRxiv* 2024.05.23.595321 (2024). <https://doi.org/10.1101/2024.05.23.595321>.
